# Supplementary material
Source: Springer Nature journal article supplement (https://www.springermedizin.de/resource/supplementary/12891_2011_1386_MOESM3_ESM.pdf/9508312)

Karlsion score (mean  $\pm$  SD)

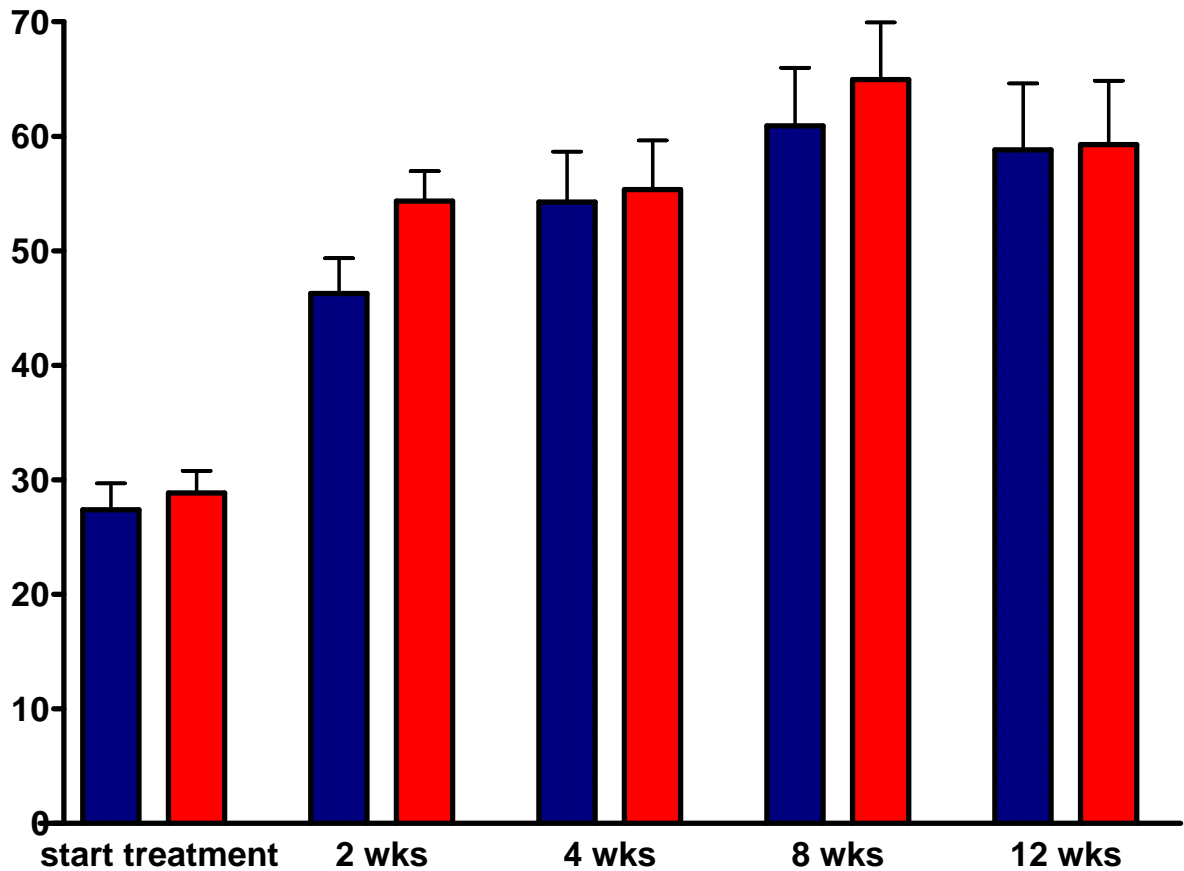

Supplement: MOESM3 [file 9508312]
